# Supplementary material for: TADs are 3D structural units of higher-order chromosome organization in Drosophila
Source: PubMed Central journal article supplement — Sci Adv. 2018 Feb 28;4(2):eaar8082. doi: 10.1126/sciadv.aar8082 (PMC5829972; doi:10.1126/sciadv.aar8082), 2018-02-28
Supplement: aar8082_SM.pdf [file aar8082_SM.pdf]

## Supplementary Materials for

### **TADs are 3D structural units of higher-order chromosome organization in *Drosophila***

Quentin Szabo, Daniel Jost, Jia-Ming Chang, Diego I. Cattoni, Giorgio L. Papadopoulos, Boyan Bonev, Tom Sexton, Julian Gurgo, Caroline Jacquier, Marcelo Nollmann, Frédéric Bantignies, Giacomo Cavalli

Published 28 February 2018, *Sci. Adv.* **4**, ear8082 (2018)  
DOI: 10.1126/sciadv.aar8082

#### **This PDF file includes:**

- fig. S1. Chromatin nanostructure visualization with 3D-SIM imaging.
- fig. S2. Dual labeling Oligopaint FISH.
- fig. S3. Resolution of homologous TADs with 3D-SIM.
- fig. S4. Oligopaint probe-targeted regions in S2R+ cells and embryos.
- fig. S5. Cell cycle staging of S2R+ cells.
- fig. S6. Super-resolution imaging of haploid chromatin folding.
- fig. S7. 2D dSTORM imaging of TAD 1 and spanning probes.
- fig. S8. Modeling the X chromatin region.
- fig. S9. Quality control of SI acquisitions.
- table S1. Libraries for Oligopaint probes.

## Supplementary Materials

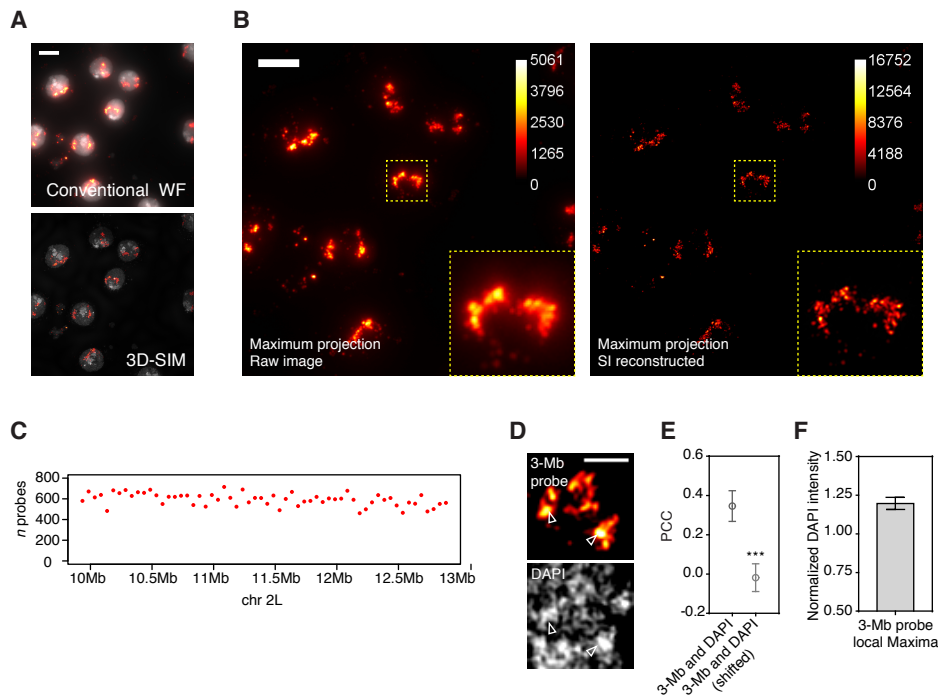

**fig. S1. Chromatin nanostructure visualization with 3D-SIM imaging.** (A) Example of conventional WF and 3D-SIM reconstructed image of DAPI (gray) and 3 Mb probe labeling in S2R+ nuclei. Scale bar: 5  $\mu$ m. (B) Raw image and structured illumination (SI) reconstructed image of the 3 Mb probe shown in (A). Scale bars: 5  $\mu$ m. (C) The 3 Mb region is homogeneously covered by a mean of 11.85 oligonucleotide probes per kb. Graph shows probe numbers in 50 kb bins along the 3 Mb region. (D) 3 Mb probe (top) and DAPI (bottom) 3D-SIM imaging in an S2R+ nucleus (single  $z$ -slices). Arrowheads indicate dense compartments for both labels. Scale bar: 1  $\mu$ m. (E) Pearson's correlation coefficient (PCC, mean  $\pm$  SD) between 3 Mb probe signal and DAPI, before or after DAPI channel shift (3 voxels in  $x/y/z$ ). \*\*\* corresponds to  $p$ -value  $< 0.0001$  using Wilcoxon matched-pairs signed rank test, 20 nuclei were analyzed. (F) DAPI intensity (mean  $\pm$  SD) of the 3 Mb probe local maxima, normalized to the mean DAPI intensity of the 3D segmented 3 Mb probe. Ratios were calculated per image (7 images/55 nuclei in total).

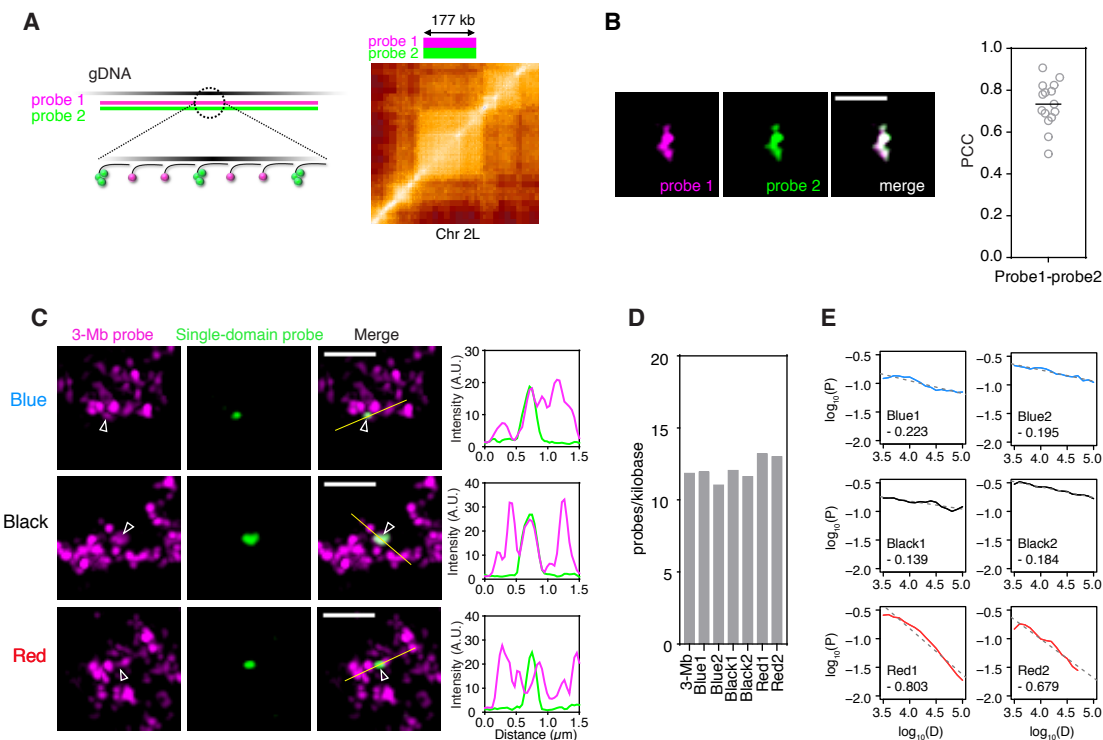

**fig. S2. Dual labeling Oligopaint FISH.** (A) Schematic representation of the dual FISH labeling. Probe 2 (green) has an oligonucleotide coverage of 1/3 of probe 1 (magenta), and is added in molar excess compared to probe 1 (at least 3:1 ratio), allowing efficient co-labeling of the same region. The probe 2 signal is increased using complementary secondary oligonucleotides carrying 2 additional fluorophores. On the right, Hi-C map around a single TAD (Black1), labeled with the two sets of probes. (B) Double labeled Black1 TAD (maximum projection). On the right, PCC between probe 1 and probe 2 intensities. 15 nuclei were analyzed, the black line indicates the mean. (C) Examples of dual FISH labeling (maximum projections) with the 3 Mb probe and single epigenetic domains (Blue2, Black1 or Red2, indicated with arrowheads). Right panel: intensity distributions of the two probes along the yellow line. (D) Average Oligopaint coverage of the 3 Mb probe in the whole region and in specific epigenetic domains targeted with single domain probes. (E) Cis-decay curves (contact probability as a function of genomic distance) within the single domains calculated in S2R+ Hi-C. On bottom left of the plots, the slope of fitted linear regression (dashed gray lines) are indicated. Scale bars: 1  $\mu$ m.

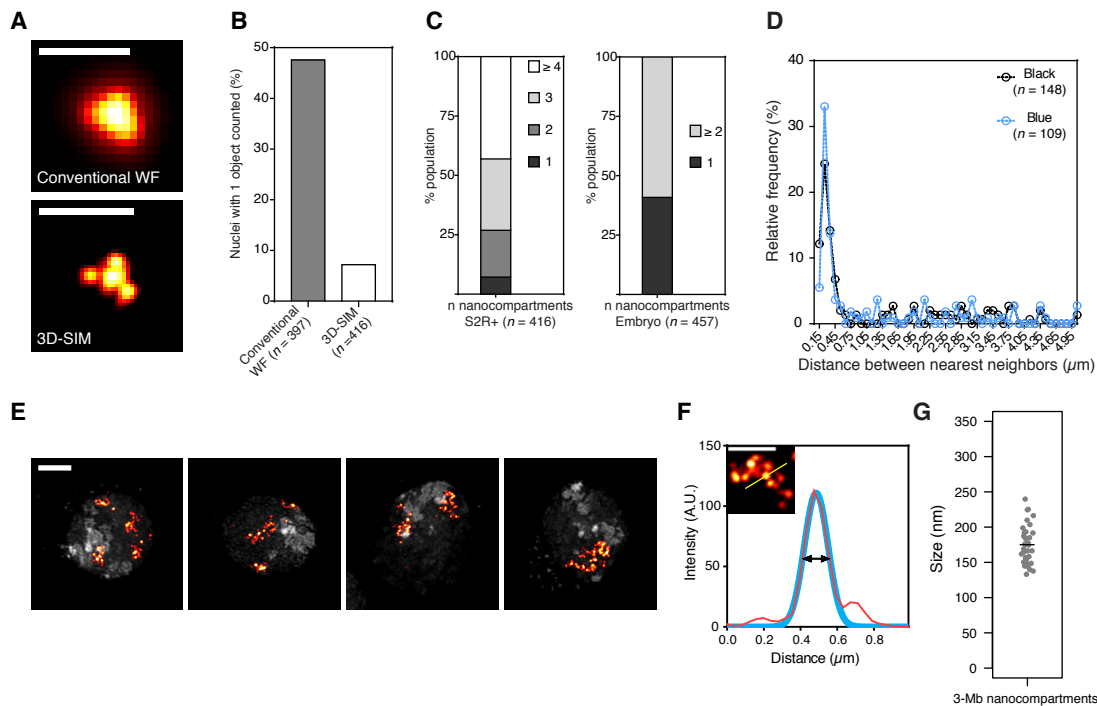

**fig. S3. Resolution of homologous TADs with 3D-SIM.** (A) Images of a single TAD (Blue1) in conventional microscopy (top) and after 3D-SIM reconstruction (bottom) in an S2R+ cell. Maximum projections, scale bars: 1  $\mu\text{m}$ . (B) Percentages of nuclei with only one foci resolved in conventional WF microscopy or 3D-SIM (merge of Blue1 and Black1 FISH experiments).  $n$  represents the number of nuclei analyzed in each condition. (C) Distributions of resolved nano-compartment counts per nucleus in S2R+ and embryonic cells (merge of Blue1 and Black1 FISH experiments) with 3D-SIM.  $n$  represents the number of nuclei analyzed in each condition. (D) Histogram of distance distribution between nearest neighbor nano-compartments observed in Black1 and Blue1 single-TAD FISH experiments. The X-axis is split into 50 nm bins (last bin represents distances > 5  $\mu\text{m}$ );  $n$  represents the number of distances measured from G1-staged S2R+ cell populations (37 and 58 nuclei for Blue1 and Black1, respectively; see fig. S5 for cell-cycle staging), to avoid measuring distances between sister chromatids. (E) Examples of S2R+ nuclei (DAPI in gray) labelled with the 3 Mb probe displaying different pairing states. From left to right: the four chromosomes unpaired, two chromosomes paired and two unpaired, two chromosomes paired twice, all chromosomes paired. Maximum projections, scale bar: 2  $\mu\text{m}$ . (F) Intensity distribution (in red) along the line drawn in the image (single copy of the 3 Mb probe, maximum projection), with a Gaussian fitted curve (in blue). Arrow represents the full width at half maximum (FWHM). Scale bar: 1  $\mu\text{m}$ . (G) FWHM-calculated diameters (black line indicates mean) of the nano-compartments observed in the 3 Mb probe ( $n=35$ ).

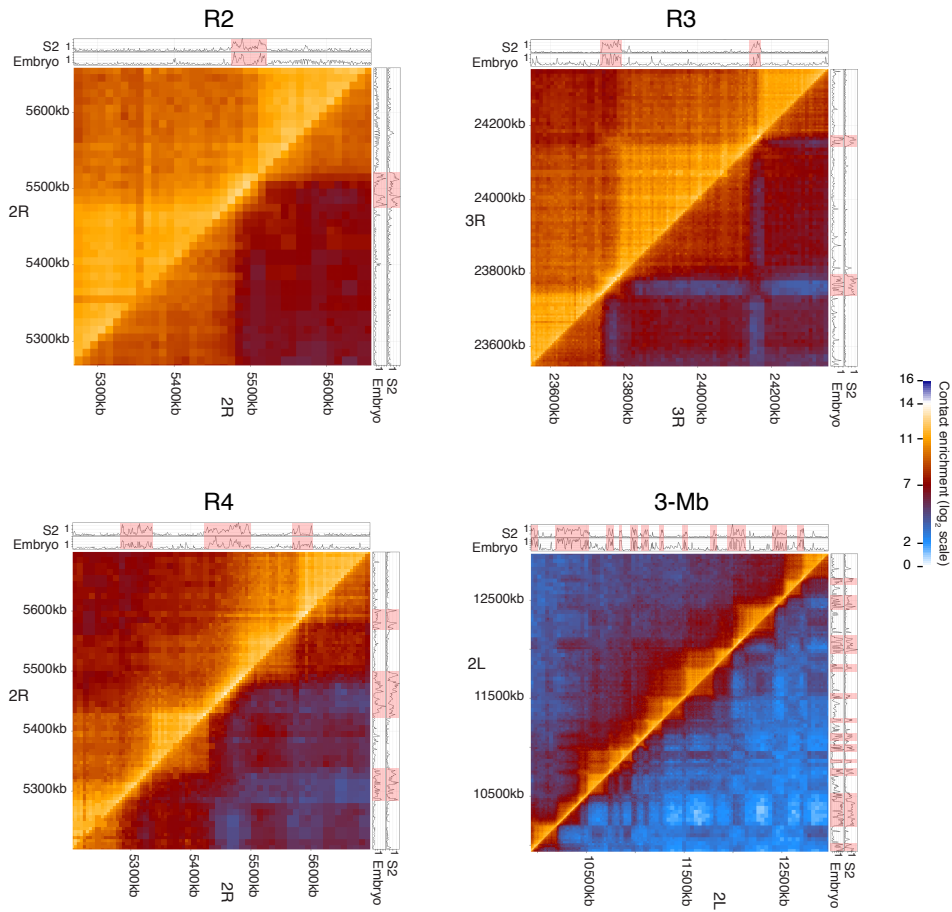

**fig. S4. Oligopaint probe-targeted regions in S2R+ cells and embryos.** Hi-C maps of Oligopaint labeled regions in S2R+ cells (top of the diagonal) and 16-18 hr embryos (bottom), showing conservation of the TADs. H3K4me3 ChIP profiles in both S2 cells and 14-16 hr embryos are also shown, allowing identification of repressed TADs. We counted 2, 3, 4 and 12 repressed TADs for R2, R3, R4 and the 3 Mb region, respectively.

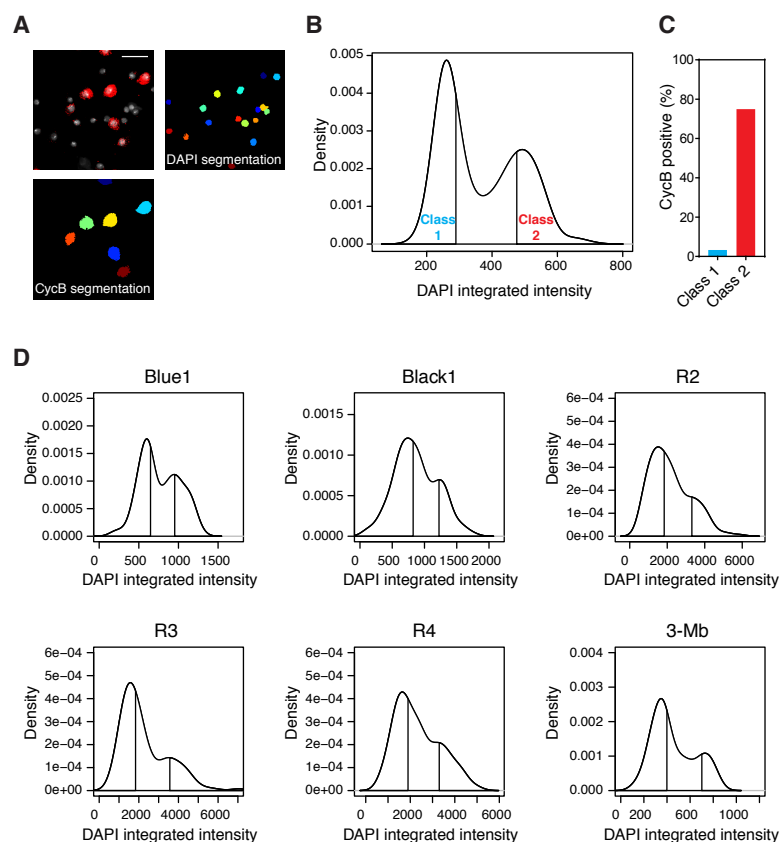

**fig. S5. Cell cycle staging of S2R+ cells.** (A) Confocal image S2R+ cells labeled with DAPI (in gray) and Cyclin-B (CycB, in red), and their 2D segmentation (individual segmented objects are represented with colored surfaces). Average projection, scale bar: 20  $\mu\text{m}$ . (B) DAPI integrated intensity distribution of the S2R+ nuclei population labeled with CycB ( $n = 414$ ). The DAPI integrated intensity reflecting the amount of DNA per nucleus (29), we obtained a profile of the cell cycle with G1 (class 1 of the distribution) and G2 (class 2 of the distribution) cells. (C) Percentage of nuclei positive for CycB segmentation in class 1 and class 2 of the distribution in (B), showing the efficiency of the cell cycle staging method. (D) DAPI integrated intensity distributions obtained in FISH experiments for Black1, Blue1, R2, R3, R4 and the 3 Mb probes (254, 213, 180, 136, 166 and 156 nuclei, respectively). Based on the DAPI integrated intensity distribution, we considered as G1 nuclei in left parts of the plots and as G2 nuclei in right part of the plots (delimited by vertical lines).

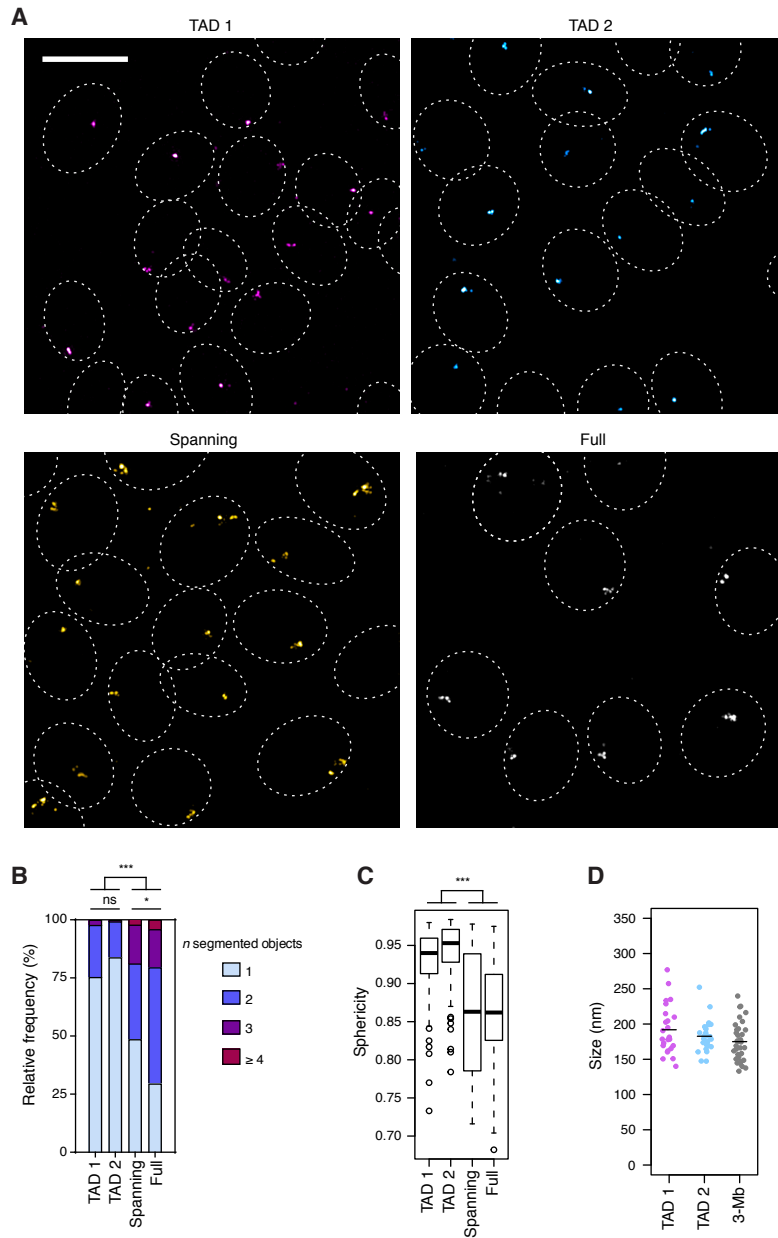

**fig. S6. Super-resolution imaging of haploid chromatin folding.** (A) 3D-SIM images of the TAD 1, TAD 2, Spanning and Full probes. Dashed lines indicate DAPI contours. Maximum projections, scale bar: 5 $\mu$ m. (B) Quantification of the number of segmented objects per nucleus (at least 122 nuclei per condition, analysis in maximum z-projected images). (C) Sphericity scores of the 3D-segmented probes (at least 68 nuclei per condition). (D) FWHM-calculated diameters (black lines indicate means) of TAD 1 ( $n=25$ ), TAD 2 ( $n=25$ ), and of nano-compartments observed in the 3 Mb probe ( $n=35$ ). Statistics were performed with Kruskal-Wallis and Dunn's multiple comparisons tests, \*\*\* indicates  $p$ -value < 0.0001, \* indicates  $p$ -value < 0.05).

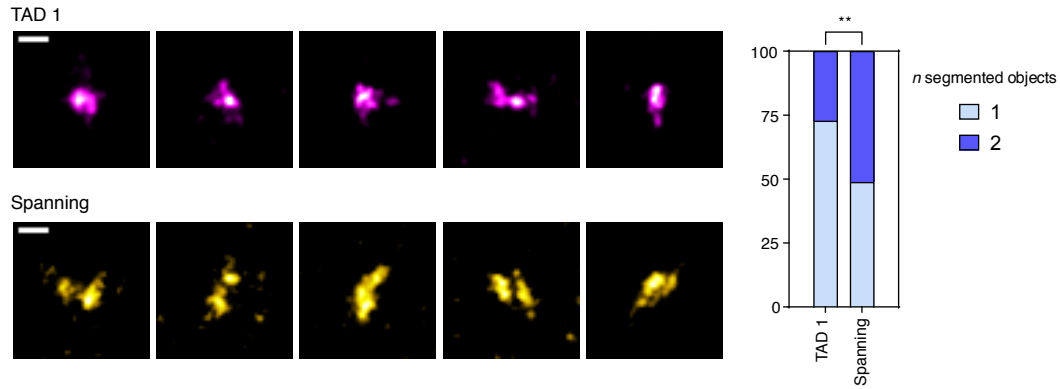

**fig. S7. 2D dSTORM imaging of TAD 1 and spanning probes.** On the left, representative examples of dSTORM imaging of TAD 1 and Spanning probes, both having the same genomic size. Scale bars: 250 nm. On the right, quantification of the number of segmented objects per nucleus (at least 55 nuclei per condition). \*\* indicates  $p$ -value  $< 0.01$  using two-tailed Fisher's exact test.



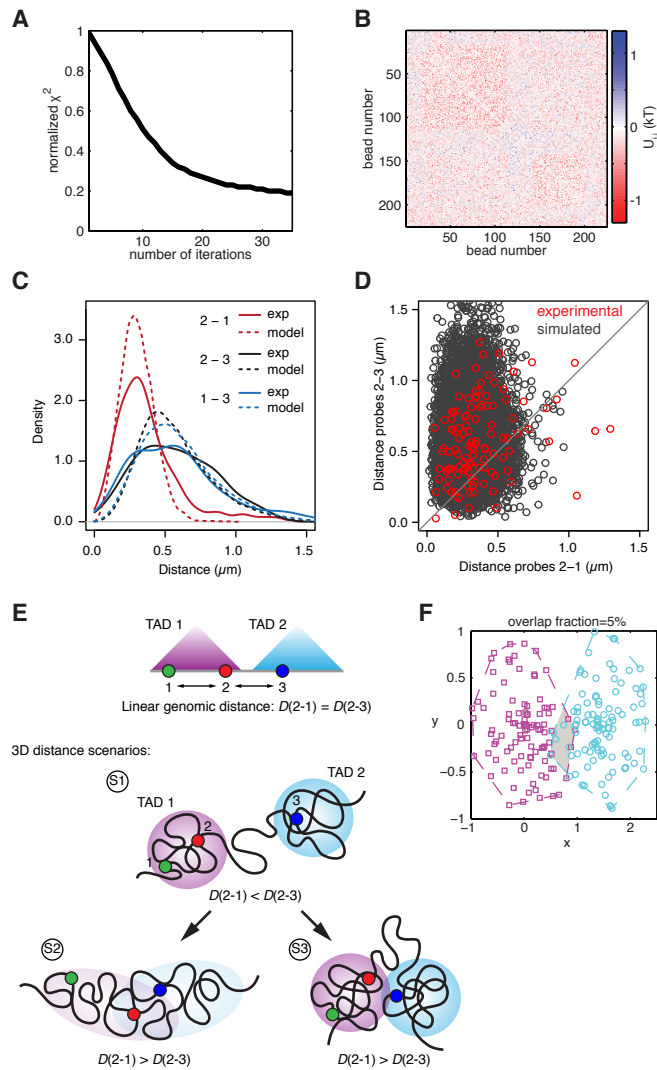

**fig. S8. Modeling the X chromatin region.** (A) Evolution of the normalized score  $\chi^2$  as a function of the number of iterations of the inference scheme, for an interaction radius  $R=143$  nm. (B) Corresponding inferred monomer-monomer interactions  $\{U_{ij}\}$ . (C) 3D distances distributions between the probes 1, 2 and 3 from FISH experiment (full lines) and inferred model (dashed lines). (D) Scatter plot of paired distances between probe 2 and probe 1 (X-axis) versus probe 2 and probe 3 (Y-axis) from FISH experiments (red) and inferred model (gray). (E) Schematic representations of 3D chromatin structure scenarios that might explain FISH experiments with equidistant probes used here. Scenario 1 (S1) represents conformations where the intra-TAD (2-1) physical distance is shorter than the inter-TAD (2-3), consistent with the formation of an individual nano-compartment for each TAD. When the intra-TAD distance is larger than the inter-TAD one, we envisaged two different scenarios: in scenario 2 (S2) the shorter inter-TAD distance is due to intermingling between TADs and loss of individual TAD nano-compartments, while in scenario 3 (S3), this is due to a change of relative spatial positioning of the TADs with maintenance of two separated nano-compartments corresponding to each of the TADs. (F) Illustration of the computation of the overlap fraction in 2D between two ensembles of points (symbols). Dashed lines represents the convex envelopes of each ensemble (purple and blue for TAD 1 and TAD 2, respectively). The overlap fraction quantifies the proportion of points that belongs to the intersection between the two envelopes (gray area).

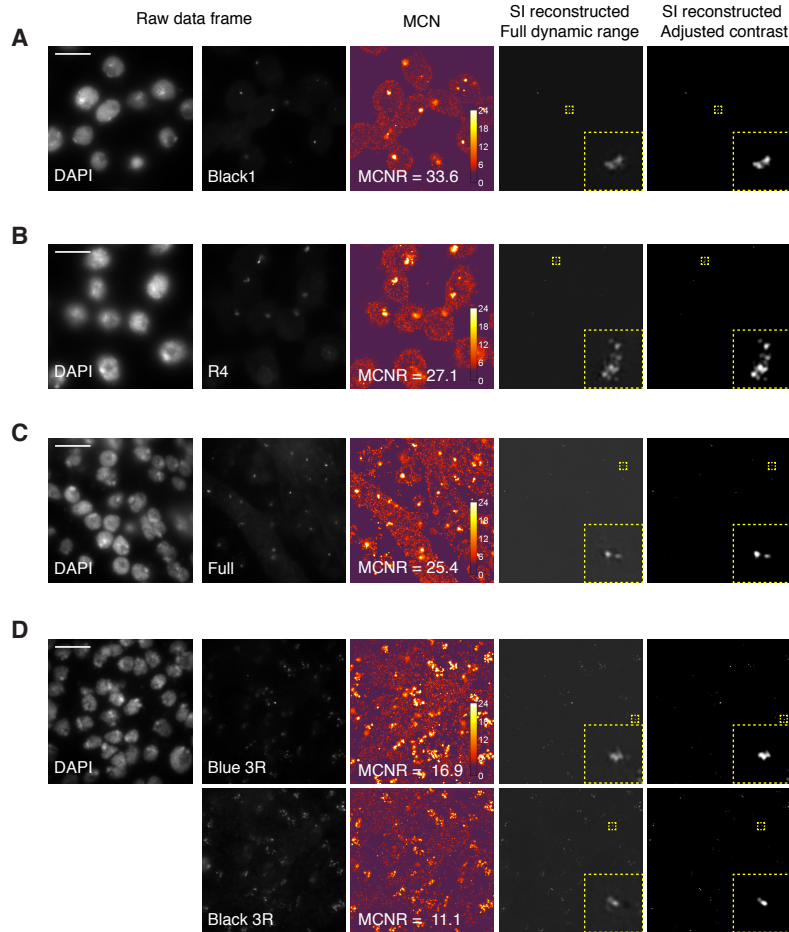

**fig. S9. Quality control of SI acquisitions.** (A-D) Examples of images and SI reconstruction outputs of FISH signals: Black1 FISH (Cy3 dye) in S2R+ cells; R4 (Atto-565 dye) FISH in S2R+ cells; Full (Atto-565 dye) FISH in embryonic cells, Blue 3R (Cy3 dye) and Black 3R (Alexa-488 dye) FISH in embryonic cells. From left to right: single frame of raw image; modulation contrast to noise (MCN) output from SIMcheck (39) plugin of ImageJ with average modulation contrast to noise ratio (MCNR) value (4-8 low to moderate, 8-12 good, > 12 good-excellent); reconstructed images with full dynamic range (from 32-bit data); reconstructed images with adjusted contrast after *Threshold and 16-bit Conversion* (SIMcheck) processing. Single z-slices, scale bars: 10  $\mu\text{m}$ .

**table S1. Libraries for Oligopaint probes.** Coordinates, genomic sizes, number of probes and coverage of the Oligopaint probes. Library code refers to the primers used to amplify libraries (see Material and Methods). Probe names in *italic* refer to the epigenetic state specific probes used in Fig. 5: B for Blue; Bk for Black; R for Red.

| Name        | Chr | 5' coordinates | 3' coordinates | Genomic size (bp) | Number of probes | Density probes/kb | Library Code |
|-------------|-----|----------------|----------------|-------------------|------------------|-------------------|--------------|
| 3-Mb        | 2L  | 9935314        | 12973080       | 3037766           | 36001            | 11,85             | -            |
| Blue1       | 2L  | 11317986       | 11468388       | 150402            | 1797             | 11,95             | B            |
| Blue2       | 2L  | 12564906       | 12685026       | 120120            | 1326             | 11,04             | C            |
| Black1      | 2L  | 10540472       | 10717954       | 177482            | 2140             | 12,06             | B            |
| Black2      | 2L  | 11547196       | 11783436       | 236240            | 2748             | 11,63             | C            |
| Red1        | 2L  | 10203092       | 10436611       | 233519            | 3085             | 13,21             | B            |
| Red2        | 2L  | 12690712       | 12739196       | 48484             | 631              | 13,01             | D            |
| Blue1 1:3   | 2L  | 11317986       | 11468388       | 150402            | 599              | 3,98              | B            |
| Blue2 1:3   | 2L  | 12564906       | 12685026       | 120120            | 442              | 3,68              | C            |
| Black1 1:3  | 2L  | 10540472       | 10717954       | 177482            | 713              | 4,02              | C            |
| Black2 1:3  | 2L  | 11547196       | 11783436       | 236240            | 916              | 3,88              | D            |
| Red1 1:3    | 2L  | 10203092       | 10436611       | 233519            | 1028             | 4,40              | D            |
| Red2 1:3    | 2L  | 12690712       | 12739196       | 48484             | 210              | 4,34              | E            |
| R2          | 2R  | 10534240       | 10729120       | 194880            | 2353             | 12,07             | A            |
| R3          | 3R  | 23547420       | 24352723       | 805303            | 9681             | 12,02             | A            |
| R4          | 2R  | 5203174        | 5698315        | 495141            | 6124             | 12,37             | B            |
| Full        | X   | 4602500        | 4961200        | 358700            | 3905             | 10,89             | A            |
| TAD1        | X   | 4602500        | 4800500        | 198000            | 2211             | 11,17             | B            |
| TAD2        | X   | 4851500        | 4961200        | 109700            | 1174             | 10,70             | C            |
| Spanning    | X   | 4727000        | 4925000        | 198000            | 2164             | 10,93             | D            |
| <i>B1</i>   | 3R  | 652785         | 713391         | 60606             | 780              | 12,87             | A            |
| <i>B2</i>   | 3R  | 2496062        | 2870013        | 373951            | 4226             | 11,30             | A            |
| <i>B3</i>   | 3R  | 3960876        | 4035090        | 74214             | 851              | 11,47             | A            |
| <i>B4</i>   | 3R  | 6342956        | 6500513        | 157557            | 1815             | 11,52             | A            |
| <i>B5</i>   | 3R  | 7155430        | 7204894        | 49464             | 599              | 12,11             | A            |
| <i>B6</i>   | 3R  | 8066650        | 8143013        | 76363             | 1006             | 13,17             | A            |
| <i>B7</i>   | 3R  | 9675674        | 9769418        | 93744             | 1163             | 12,41             | A            |
| <i>B8</i>   | 3R  | 12199694       | 12252379       | 52685             | 605              | 11,48             | A            |
| <i>B9</i>   | 3R  | 12488250       | 12800730       | 312480            | 3526             | 11,28             | A            |
| <i>Bk1</i>  | 3R  | 2295136        | 2461552        | 166416            | 2002             | 12,03             | A            |
| <i>Bk2</i>  | 3R  | 3388064        | 3520312        | 132248            | 1620             | 12,25             | A            |
| <i>Bk3</i>  | 3R  | 4204574        | 4332372        | 127798            | 1512             | 11,83             | A            |
| <i>Bk4</i>  | 3R  | 6006587        | 6076245        | 69658             | 770              | 11,05             | A            |
| <i>Bk5</i>  | 3R  | 6734612        | 6947878        | 213266            | 2425             | 11,37             | A            |
| <i>Bk6</i>  | 3R  | 7950439        | 8030369        | 79930             | 1012             | 12,66             | A            |
| <i>Bk7</i>  | 3R  | 8556860        | 8764131        | 207271            | 2337             | 11,28             | A            |
| <i>Bk8</i>  | 3R  | 9304896        | 9449352        | 144456            | 1646             | 11,39             | A            |
| <i>Bk9</i>  | 3R  | 9966695        | 10042715       | 76020             | 798              | 10,50             | A            |
| <i>Bk10</i> | 3R  | 10740256       | 10895936       | 155680            | 1848             | 11,87             | A            |
| <i>Bk11</i> | 3R  | 11523771       | 11601926       | 78155             | 865              | 11,07             | A            |
| <i>Bk12</i> | 3R  | 12989300       | 13190808       | 201508            | 2434             | 12,08             | A            |
| <i>R1</i>   | 3R  | 2176766        | 2217786        | 41020             | 547              | 13,33             | A            |
| <i>R2</i>   | 3R  | 2890321        | 2929421        | 39100             | 487              | 12,46             | B            |
| <i>R3</i>   | 3R  | 3825350        | 3863180        | 37830             | 545              | 14,41             | A            |
| <i>R4</i>   | 3R  | 4832892        | 4891933        | 59041             | 794              | 13,45             | B            |
| <i>R5</i>   | 3R  | 5567252        | 5631767        | 64515             | 955              | 14,80             | A            |
| <i>R6</i>   | 3R  | 6675854        | 6719646        | 43792             | 589              | 13,45             | B            |
| <i>R7</i>   | 3R  | 7027809        | 7070005        | 42196             | 588              | 13,93             | A            |
| <i>R8</i>   | 3R  | 7407477        | 7481767        | 74290             | 1005             | 13,53             | B            |
| <i>R9</i>   | 3R  | 8222335        | 8291151        | 68816             | 928              | 13,49             | A            |
| <i>R10</i>  | 3R  | 8809823        | 8857134        | 47311             | 643              | 13,59             | B            |
| <i>R11</i>  | 3R  | 9464906        | 9524338        | 59432             | 758              | 12,75             | A            |
| <i>R12</i>  | 3R  | 10112285       | 10152845       | 40560             | 525              | 12,94             | B            |
| <i>R13</i>  | 3R  | 11144574       | 11199314       | 54740             | 830              | 15,16             | A            |
| <i>R14</i>  | 3R  | 12257868       | 12296968       | 39100             | 547              | 13,99             | B            |
| <i>R15</i>  | 3R  | 12862169       | 12906743       | 44574             | 544              | 12,20             | A            |
